# Supplementary material for: Eye position modulates retinotopic responses in early visual areas: a bias for the straight-ahead direction
Source: PubMed Central journal article supplement (PMC4549389; doi:10.1007/s00429-014-0808-7), 2014-06-19
Supplement: 429_2014_808_MOESM1_ESM.pdf [file 429_2014_808_MOESM1_ESM.pdf]

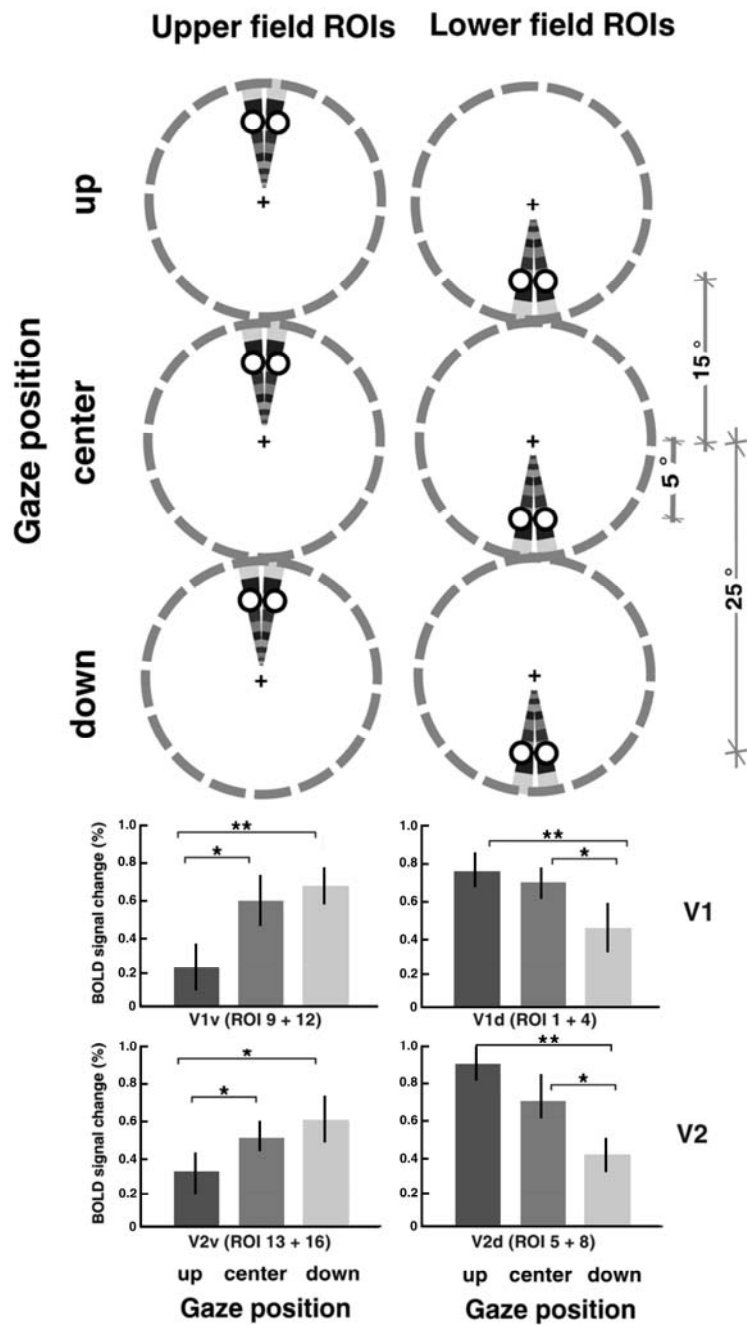

**Figure 8** Averaged response amplitudes during gaze-up, gaze-center, and gaze-down conditions in the upper and lower field ROIs.

The vertically aligned dashed circles in each column represent the three different gaze position conditions (-20, 0, +20 degrees vertical). Visual stimulation consisted of a flickering checkerboard wedge rotating in a counterclockwise direction. White points on the wedges indicate the (single-voxel size) regions of interest. For each visual cortical area four regions have been sampled near the

vertical meridian (V1: region 1, 4, 9, 12; V2: region 5, 8, 13, 16; see Fig. 2 in the main text for further ROIs details). Graph bars indicate extracted BOLD responses in the gaze-up, gaze-center, and gaze-down conditions in cortical visual areas V1 and V2. Beta-weights were estimated using the general linear model (GLM) in each of the ROIs for each of the regressors: gaze-up, gaze-center, and gaze-down. The two panels represent the set of points sampled close to the vertical meridian in the upper and lower visual field respectively. Error bars represent  $\pm$  mean squared error, (\*  $p < 0.05$ , \*\*  $p < 0.01$  ).

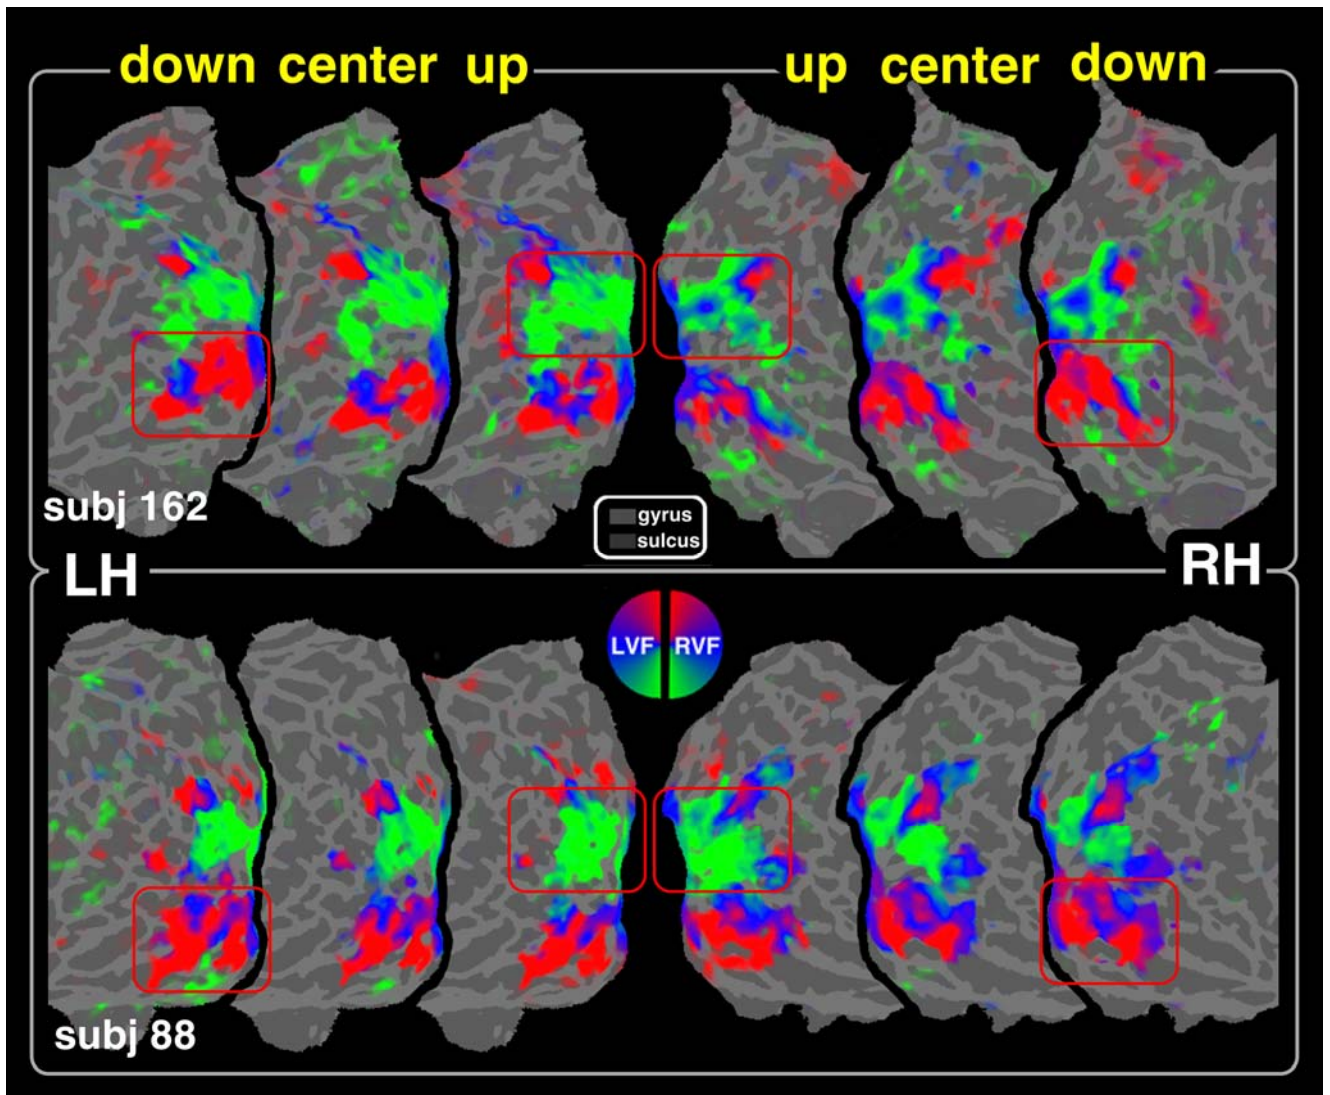

**Figure 9 Maps of polar angle in two representative subjects**

Colors on the flattened maps codify the response phase of each voxel for a counter-clockwise rotating wedge. Each hemisphere represents the response phase for a particular eye position (down/center/up). Red rectangles underlie enhanced visual areas by gain modulations: dorsal stream in gaze-up and ventral stream in gaze-down conditions.

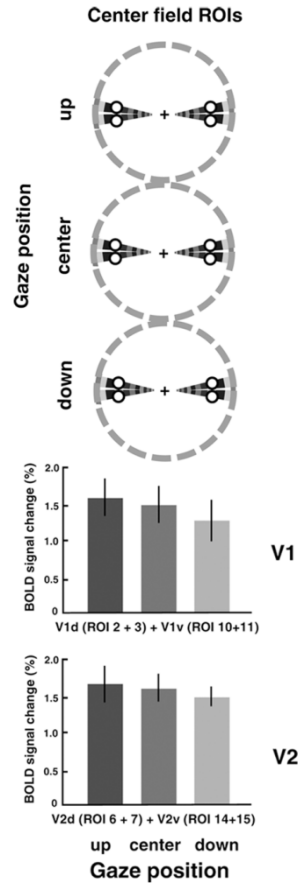

**Figure 10 Averaged response amplitude during gaze-up, gaze-center, and gaze-down conditions on the peak response, across all six subjects.**

The vertically aligned dashed circles represent the three different gaze position conditions (+20, 0, -20 degrees vertical). White points on the wedges indicate the (single-voxel size) regions of interest. For each visual cortical area four regions have been sampled near the horizontal meridian (V1: region 2, 3, 10, 11; V2: region 5, 6, 14, 15; see Fig. 2 for further ROIs details). Graph bars indicate BOLD signal change in the Gaze-Up, Gaze-Center, and Gaze-Down conditions in cortical visual areas V1 (dorsal and ventral) and V2 (dorsal and ventral). Error bars represent  $\pm$  SEM.
